# Supplementary material for: SATB2-Nanog axis links age-related intrinsic changes of mesenchymal stem cells from craniofacial bone
Source: publisher site journal article supplement (doi:10.18632/aging.101041), 2016-09-14
Supplement: Supplementary file 1 [file aging-v8i9-101041-supplementary-material-SD1.pdf]

**SUPPLEMENTARY MATERIAL**

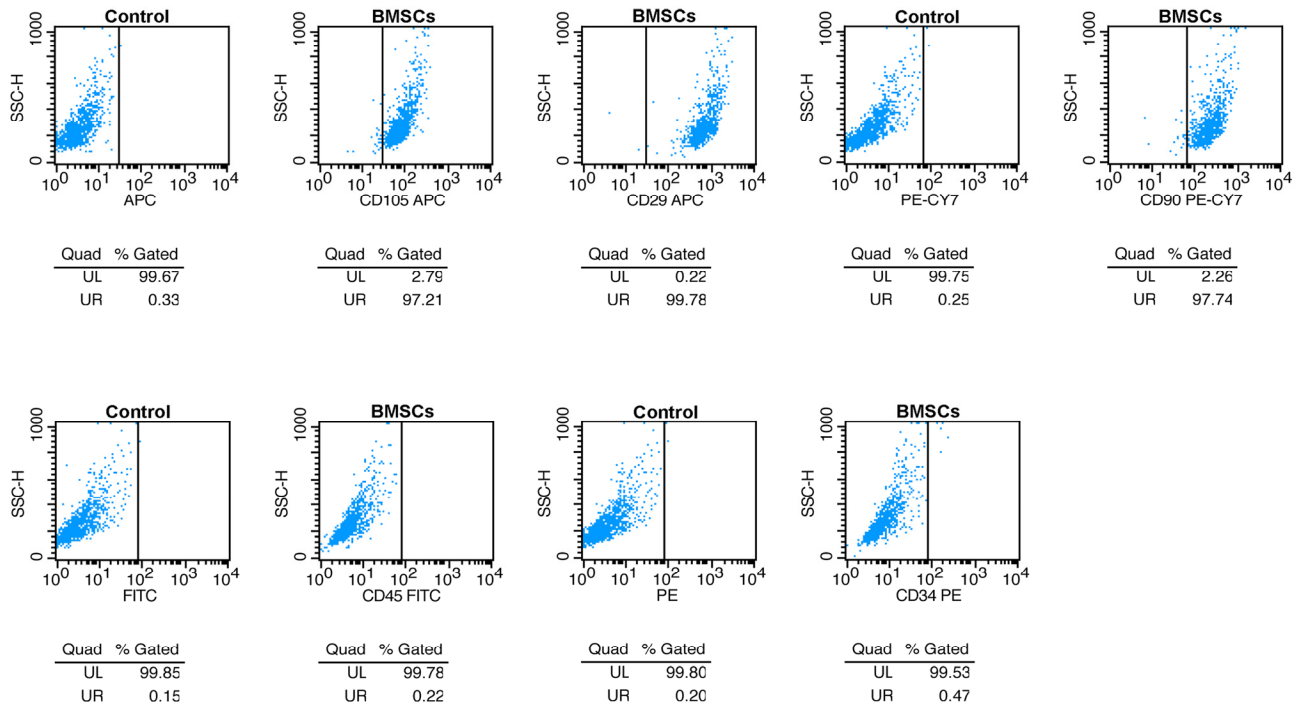

**Supplementary Figure S1. BMSCs were confirmed by flow cytometry.**

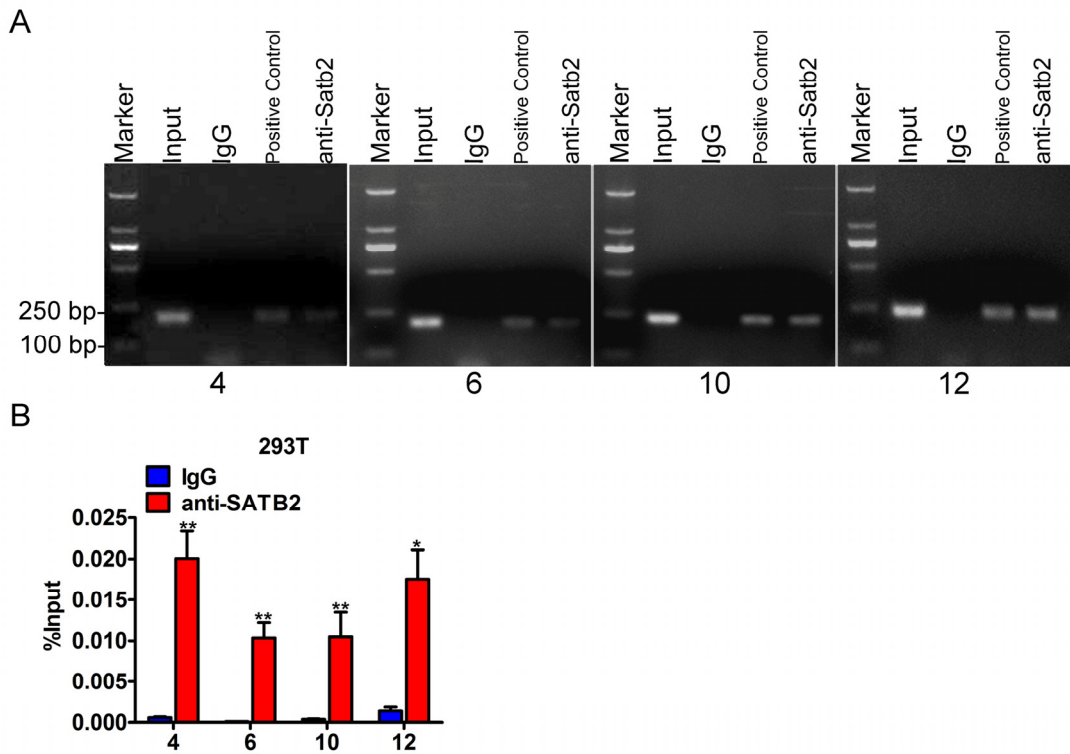

**Supplementary Figure S2. (A)** ChIP assays showed four putative binding sites among 12 primers covering the upstream -1850~+350 of SATB2 in human Nanog promoter region in BMSCs. **(B)** The four positive binding sites were further proved in 293T cells by real-time PCR. \*p < 0.05, \*\*p < 0.01.

**Table S1. Antibodies used in Western blot**

| Antibody       | Dilution | Source                     | Code number |
|----------------|----------|----------------------------|-------------|
| SATB2          | 1:800    | Abcam                      | Ab69995     |
| NANOG          | 1:400    | Santa Cruz                 | SC-33760    |
| SOX2           | 1:400    | Santa Cruz                 | SC-17320    |
| OCT4           | 1:400    | Santa Cruz                 | SC-5279     |
| RUNX2          | 1:1000   | Cell Signaling Technology  | #12556      |
| OSX            | 1:800    | Abcam                      | Ab22552     |
| OPN            | 1:800    | Bioworld                   | BS1264      |
| P16            | 1:800    | Abcam                      | Ab51243     |
| P21            | 1:500    | Proteintech                | 10355-1-AP  |
| P53            | 1:500    | Proteintech                | 10442-1-AP  |
| $\beta$ -actin | 1:800    | Boisynthesis Biotechnology | Bs-oo61R    |

**Table S2. Sequence information on specific primers used in this study**

| Gene   | Primer Sequence (5' - 3')                                                   | Product size (bp) | T <sub>m</sub> (°C) |
|--------|-----------------------------------------------------------------------------|-------------------|---------------------|
| Satb2  | F: 5'- CCAGGAGTTTGGGAGATGGTAT - 3'<br>R: 5'- GTGAGGAGACTGTTCGTTGGTT - 3'    | 101               | 60.0                |
| Nanog  | F: 5'- AAGGTCCCGGTCAAGAAACAG - 3'<br>R: 5'- CTTCTGCGTCACACCATTGC - 3'       | 126               | 59.7                |
| Sox2   | F: 5'- GGCAGAGAAGAGAGTGTTC - 3'<br>R: 5'- GCCGCCGATGATTGTTATT - 3'          | 120               | 59.8                |
| Oct4   | F: 5'- TGAGAGGCAACCTGGAGAAT - 3'<br>R: 5'- AACCACACTCGGACCACATC - 3'        | 115               | 60.0                |
| OPG    | F: 5'- GCGCTCGTGTCTTCTGGACATC-3'<br>R: 5'- CCAGGAGGACATTTGTCACACAAC - 3'    | 149               | 61.9                |
| RANK   | F: 5'- GAGGCACCAGAGTTAGTCTGC - 3'<br>R: 5'- GGAGGTGTTACGTTGAGAATC - 3'      | 101               | 61.9                |
| RANKL  | F: 5'- TGCCAGTGGGAGATGTTAGAC - 3'<br>R: 5'- CCTTCAATTGCGCTAGATGAC - 3'      | 119               | 60.0                |
| M-CSF  | F: 5'- TAGCCACATGATTGGGAGTGGA - 3'<br>R: 5'- CTCAAATGTAATTTGGCACGAGGTC - 3' | 122               | 60.0                |
| Leptin | F: 5'- AGTTGTA CTCCAGTGCGTCTC - 3'<br>R: 5'- TACTTTCACAGTCGGGTT - 3'        | 130               | 59.8                |

|                 |                                                                             |     |      |
|-----------------|-----------------------------------------------------------------------------|-----|------|
| PPAR- $\gamma$  | F: 5'- AGCTGAACCACCTGAGTCC - 3'<br>R: 5'- TCATGTCTGTCTCCGTCTTCTTG - 3'      | 125 | 59.9 |
| C/EBP- $\alpha$ | F: 5'- CACGAAGCACGATCAGTCCAT - 3'<br>R: 5'- CGCACATTCACATTGCACAAG - 3'      | 124 | 59.8 |
| GAPDH           | F: 5'- GGAGATTACTGCCCTGGCTCCTA - 3'<br>R: 5'- GACTCATCGTACTCCTGCTTGCTG - 3' | 178 | 60.0 |

**Table S3. Sequence of the 12 ChIP primers.** Red represents four positive binding sites

| Number         |                      | Primers                                                           | Sites               |
|----------------|----------------------|-------------------------------------------------------------------|---------------------|
| Nanog1         | F<br>R               | CATTTTAACACATCCTTAGTCCAGC<br>GCTCCCTGTCCCATTGTGT                  | `-1850~-1663        |
| Nanog2         | F<br>R               | AATGGGACAGGGAGCGG<br>GAAATAGGATGATTTCTTTAAAAGAAGG                 | `-1677~-1453        |
| Nanog3         | F<br>R               | AAGAAATCATCCTATTTCTACGAGA<br>TATTGCTTGATGTGAAACAAGGA              | `-1470~-1301        |
| <b>Nanog4</b>  | <b>F</b><br><b>R</b> | <b>AGGAGCAGAGTGCAGAGGAG</b><br><b>CTTCCTATTCCCAAACCCAAC</b>       | <b>`-1226~-1076</b> |
| Nanog5         | F<br>R               | GGGTTGGGAATAGGAAGGA<br>GTGGGTGTGTGTTTCTGG                         | `-1093~-965         |
| <b>Nanog6</b>  | <b>F</b><br><b>R</b> | <b>CCATAAATGTTAGTGCTGGAACC</b><br><b>AGTTTGGTTTCTTGTCTATCCCTC</b> | <b>`-1050~-838</b>  |
| Nanog7         | F<br>R               | AAAGGAACTAAGGTAGGTGCTGA<br>CATGCACCTTAAATTCCTGAGG                 | `-836~-601          |
| Nanog8         | F<br>R               | CAGGAATTTAAGGTGCATGC<br>GAGTTTGAAACCAGCCTGGC                      | `-619~-366          |
| Nanog9         | F<br>R               | TGGCCAGGCTGGTTTC<br>CCAGCAACAAATACTTCTAGGTTC                      | `-387~-186          |
| <b>Nanog10</b> | <b>F</b><br><b>R</b> | <b>GCTGGGTTTGTCTTCAGGTT</b><br><b>TCCCGTCTACCAGTCTCACC</b>        | <b>`-190~-79</b>    |
| Nanog11        | F<br>R               | AAATCTTTGTTAAATTTTGGTTGG<br>AAGCTGGAGTGCAGTGGTGT                  | `+1~+200            |
| <b>Nanog12</b> | <b>F</b><br><b>R</b> | <b>GGTAGGTGGAGGTTGTAGTGAG</b><br><b>TGCACATGTACAATGCACGT</b>      | <b>`+151~+350</b>   |
